# Supplementary material for: Consolidation and maturation of the orthopaedic medical device market between 1999 and 2015
Source: Springer Nature journal article supplement (doi:10.1007/s00590-019-02372-z), 2019-01-09
Supplement: MOESM2 [file 16387662]

| **Year** | **Adjustments** |
| --- | --- |
| **1999** | Biomet sales for fiscal year ended May 31, 2000; excludes 3i. |
|  | ConMed includes only arthroscopy and power instruments. |
|  | Johnson & Johnson includes DePuy Ace, DePuy AcroMed, DePuy Orthopaedics, Innovasive Devices and Mitek, the latter a division of Ethicon Endosurgery. |
|  | Medtronic includes Sofamor Danek and Midas Rex. |
|  | Stryker excludes patient handling equipment, physiotherapy products and endoscopic equipment used in nonorthopaedic areas. |
|  | Sulzer excludes Calcitek. |
| **2000** | Biomet excludes 3i. |
|  | ConMed includes only arthroscopy and power instruments. |
|  | Johnson & Johnson includes DePuy Ace, DePuy AcroMed, DePuy Orthopaedics, Innovasive Devices and Mitek, the latter a division of Ethicon Endosurgery. |
|  | Smith & Nephew includes orthopaedics, fracture fixation, that portion of the company’s endoscopy division dedicated to arthroscopy/orthopaedic applications, and a portion of wound management specific to orthopaedics. |
|  | Stryker excludes patient handling equipment, physiotherapy products and endoscopic equipment used in nonorthopaedic areas. |
|  | Sulzer excludes Calcitek. |
| **2001** | Biomet and Centerpulse sales exclude those for dental products. |
|  | ConMed includes only arthroscopy and power instrument sales. |
|  | Johnson & Johnson includes sales for DePuy Ace, DePuy AcroMed, DePuy Orthopaedics and Mitek (a division of Ethicon Endosurgery). |
|  | Mathys includes 2001 sales for Keramed. |
|  | Medtronic excludes neurosurgery product sales. |
|  | Smith & Nephew’s sales include those for orthopaedics, fracture fixation and arthroscopy/soft tissue repair (a portion of the company’s endoscopy division), in addition to estimated sales for Instrument Makar. Excluded are rehabilitation sales. |
|  | Stryker excludes sales for patient handling equipment, physiotherapy products and endoscopic equipment used in non-orthopaedic areas and includes 2001 sales for Surgical Dynamics’ spinal business. |
| **2002** | Biomet and Zimmer sales exclude those for dental products. |
|  | ConMed includes only arthroscopy and power instrument sales; also includes sales for Bionx. |
|  | J&J includes sales for DePuy Ace, DePuy AcroMed, DePuy Orthopaedics and Mitek. MSD excludes neurosurgery product sales. |
|  | S&N’s sales include those for orthopaedics, fracture fixation and arthroscopy/soft tissue repair (a portion of the company’s endoscopy division) and exclude rehabilitation sales. |
|  | Stryker excludes sales for patient handling equipment, physiotherapy products and endoscopic equipment used in non-orthopaedic areas. |
|  | Synthes includes sales for Mathys’ osteosynthesis business. |
|  | Zimmer includes sales for Centerpulse, except dental. |
| **2003** | Biomet and Zimmer sales exclude those for dental products. |
|  | ConMed includes only arthroscopy and power instrument sales; also includes sales for Bionx. |
|  | J&J includes sales for DePuy Ace, DePuy AcroMed, DePuy Orthopaedics and Mitek. |
|  | MSD excludes neurosurgery product sales. |
|  | S&N’s sales include those for orthopaedics, fracture fixation and arthroscopy/soft tissue repair (a portion of the company’s endoscopy division) and exclude rehabilitation sales. |
|  | Stryker excludes sales for patient handling equipment, physiotherapy products and endoscopic equipment used in non-orthopaedic areas. |
|  | Synthes includes sales for Mathys’ osteosynthesis business. |
|  | Zimmer includes sales for Centerpulse, except dental. |
| **2004** | Biomet and Zimmer sales exclude those for dental products. |
|  | ConMed includes only arthroscopy and power instrument sales |
|  | MSD excludes neurosurgery product sales. |
|  | S&N’s sales include those for orthopaedics and arthroscopy (a portion of the company’s endoscopy division) and exclude wound management product revenues |
|  | Stryker excludes sales for patient handling equipment, physiotherapy products and endoscopic equipment used in non-orthopaedic areas. |
| **2005** | Biomet and Zimmer sales exclude those for dental products. |
|  | ConMed includes only arthroscopy and power instrument sales |
|  | S&N’s sales include those for orthopaedics and arthroscopy (a portion of the company’s endoscopy division) and exclude wound management product revenues |
|  | Stryker excludes sales for patient handling equipment, physiotherapy products and endoscopic equipment used in non-orthopaedic areas. |
| **2006** | Biomet and Zimmer sales exclude those for dental products. |
|  | Johnson & Johnson sales do not include those for Codman. |
|  | S&N’s sales include those for orthopaedics and arthroscopy (a portion of the company’s endoscopy division) and exclude wound management product revenues |
|  | Stryker excludes sales for patient handling equipment, physiotherapy products and endoscopic equipment used in non-orthopaedic areas. |
| **2007** | Biomet and Zimmer sales exclude those for dental products. |
|  | Johnson & Johnson sales do not include those for Codman. |
|  | S&N’s sales include those for orthopaedics and arthroscopy (a portion of the company’s endoscopy division) and exclude wound management product revenues |
|  | Stryker excludes sales for patient handling equipment, physiotherapy products and endoscopic equipment used in non-orthopaedic areas. |
| **2008** | Biomet and Zimmer sales exclude those for dental products. |
|  | Johnson & Johnson sales do not include those for Codman. |
|  | S&N’s sales include those for orthopaedics and arthroscopy (a portion of the company’s endoscopy division) and exclude wound management product revenues |
|  | Stryker excludes sales for patient handling equipment, physiotherapy products and endoscopic equipment used in non-orthopaedic areas. |
| **2009** | Biomet and Zimmer sales exclude those for dental products. |
|  | Johnson & Johnson sales do not include those for Codman. |
|  | S&N’s sales include those for orthopaedics and arthroscopy (a portion of the company’s endoscopy division) and exclude wound management product revenues |
|  | Stryker excludes sales for patient handling equipment, physiotherapy products and endoscopic equipment used in non-orthopaedic areas. |
| **2010** | Biomet and Zimmer exclude sales of dental products. |
|  | Johnson & Johnson sales do not include those for Codman. |
|  | Smith & Nephew’s sales include those for orthopaedics and arthroscopy (a portion of the company’s Endoscopy division), but exclude wound management product revenues. |
|  | Stryker excludes sales for patient handling equipment, physiotherapy products and endoscopic equipment used in non-orthopaedic areas. |
| **2011** | Biomet and Zimmer exclude sales of dental products. |
|  | Stryker excludes sales for patient handling equipment, physiotherapy products and endoscopic equipment used in non-orthopaedic areas. |
|  | Smith & Nephew sales included those for orthopaedic reconstruction, arthroscopy, trauma & extremities, and sports medicine, and excluded wound management product revenues. |
|  | Medtronic sales comprise of the Spinal segment. |
|  | ConMed includes only arthroscopy and power instrument sales |
| **2012** | Biomet and Zimmer exclude sales of dental products. |
|  | Stryker excludes sales for patient handling equipment, physiotherapy products and endoscopic equipment used in non-orthopaedic areas. |
|  | Smith & Nephew sales included those for orthopaedic reconstruction, arthroscopy, trauma & extremities, and sports medicine, and excluded wound management product revenues. |
|  | Medtronic sales comprise of the Spinal segment. |
|  | ConMed includes only arthroscopy and power instrument sales |
| **2013** | Biomet and Zimmer exclude sales of dental products. |
|  | Stryker excludes sales for patient handling equipment, physiotherapy products and endoscopic equipment used in non-orthopaedic areas. |
|  | Smith & Nephew sales included those for orthopaedic reconstruction, arthroscopy, trauma & extremities, and sports medicine, and excluded wound management product revenues. |
|  | Medtronic sales comprise of the Spinal segment. |
|  | ConMed sales exclude general surgical segment sales |
| **2014** | Biomet and Zimmer exclude sales of dental products. |
|  | Stryker excludes sales for patient handling equipment, physiotherapy products and endoscopic equipment used in non-orthopaedic areas. |
|  | Smith & Nephew sales included those for orthopaedic reconstruction, arthroscopy, trauma & extremities, and sports medicine, and excluded wound management product revenues. |
|  | Medtronic sales comprise of the Spinal segment. |
|  | ConMed sales exclude general surgical segment sales |
| **2015** | Biomet and Zimmer exclude sales of dental products. |
|  | Stryker excludes sales for patient handling equipment, physiotherapy products and endoscopic equipment used in non-orthopaedic areas. |
|  | Smith & Nephew sales included those for orthopaedic reconstruction (hip and knee), arthroscopy, trauma & extremities, and sports medicine joint repair, and excluded wound management product revenues. |
|  | Medtronic sales comprise of the Spinal segment. |
|  | ConMed sales exclude general surgical segment sales |
